# Supplementary material for: Objective assessment of tapering of the fingers in adults
Source: PubMed Central journal article supplement (PMC9797067; doi:10.1371/journal.pone.0279202), 2022-12-28
Supplement: pone.0279202.s001.pdf [file pone.0279202.s001.pdf]

**S1 Table. Norms for Finger/Digit Tapering in U.S. Adults of European Ancestry.**

|                 | Males (n = 166) |       |       |       |       |       |       | Females (n = 166) |       |       |       |       |       |       |
|-----------------|-----------------|-------|-------|-------|-------|-------|-------|-------------------|-------|-------|-------|-------|-------|-------|
|                 | -3sd            | -2sd  | -1sd  | Mean  | +1sd  | +2sd  | +3sd  | -3sd              | -2sd  | -1sd  | Mean  | +1sd  | +2sd  | +3sd  |
| Digit 2 (Left)  | 0.769           | 0.798 | 0.827 | 0.856 | 0.885 | 0.914 | 0.943 | 0.760             | 0.789 | 0.818 | 0.847 | 0.876 | 0.905 | 0.934 |
| Digit 3 (Left)  | 0.752           | 0.788 | 0.824 | 0.860 | 0.896 | 0.932 | 0.968 | 0.768             | 0.797 | 0.826 | 0.855 | 0.884 | 0.913 | 0.942 |
| Digit 4 (Left)  | 0.735           | 0.778 | 0.821 | 0.864 | 0.907 | 0.950 | 0.993 | 0.747             | 0.784 | 0.821 | 0.858 | 0.895 | 0.932 | 0.969 |
| Digit 5 (Left)  | 0.787           | 0.829 | 0.871 | 0.913 | 0.955 | 0.997 | 1.039 | 0.798             | 0.830 | 0.862 | 0.894 | 0.926 | 0.958 | 0.990 |
| Digit 2 (Right) | 0.771           | 0.802 | 0.833 | 0.864 | 0.895 | 0.926 | 0.957 | 0.768             | 0.798 | 0.828 | 0.858 | 0.888 | 0.918 | 0.948 |
| Digit 3 (Right) | 0.754           | 0.788 | 0.822 | 0.856 | 0.890 | 0.924 | 0.958 | 0.760             | 0.791 | 0.822 | 0.853 | 0.884 | 0.915 | 0.946 |
| Digit 4 (Right) | 0.759           | 0.796 | 0.833 | 0.870 | 0.907 | 0.944 | 0.981 | 0.757             | 0.792 | 0.827 | 0.862 | 0.897 | 0.932 | 0.967 |
| Digit 5 (Right) | 0.785           | 0.823 | 0.861 | 0.899 | 0.937 | 0.975 | 1.013 | 0.789             | 0.824 | 0.859 | 0.894 | 0.929 | 0.964 | 0.999 |
